# Supplementary material
Source: publisher figshare collection journal article supplement (https://acs.figshare.com/ndownloader/files/24454864)
Supplement: Supplementary file 1 [file 24454864]

Supporting Information for

# Pt Nanoparticle-Decorated CdS Photocatalysts for CO<sub>2</sub> Reduction and H<sub>2</sub> Evolution

*Yu Peng,<sup>†</sup> Shuai Kang,<sup>‡</sup> and Zhuofeng Hu<sup>\*†</sup>*

<sup>†</sup>School of Environmental Science and Engineering, Guangdong Provincial Key Laboratory of Environmental Pollution Control and Remediation Technology, Sun Yat-sen University, Guangzhou 510275, China.

<sup>‡</sup>Micro-nano Manufacturing and System Integration Center, Chongqing Institute of Green and Intelligent Technology (CIGIT), Chinese Academy of Sciences (CAS), Chongqing 400714, P. R. China.

\* Corresponding authors.

*E-mail: [huzhf8@mail.sysu.edu.cn](mailto:huzhf8@mail.sysu.edu.cn) (Z. F. Hu)*

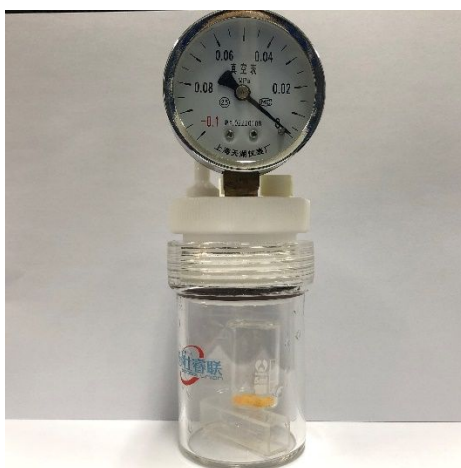

**Figure S1.** Photo of Home-made CO<sub>2</sub> photoreduction reactor.

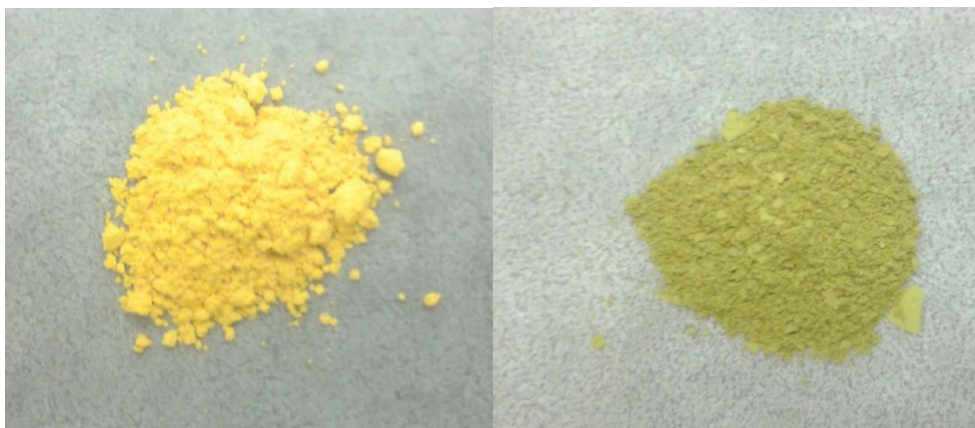

**Figure S2.** Photo of CdS before and after Pt deposition by polyol reduction method.

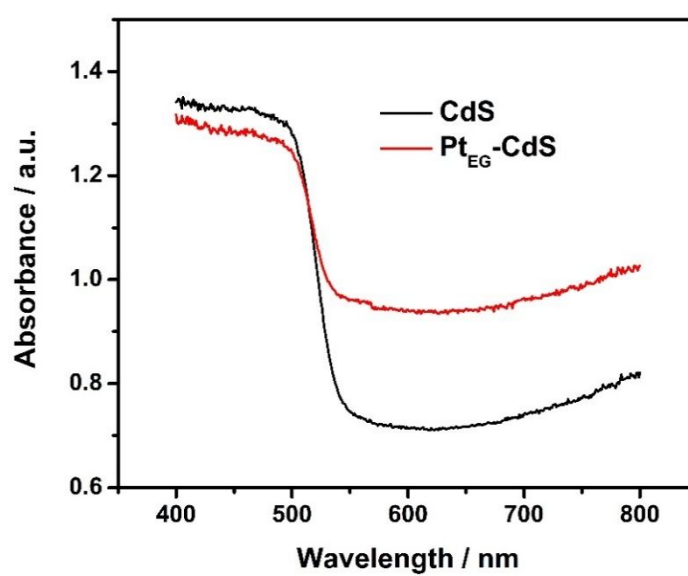

**Figure S3.** UV-visible diffuse reflectance spectra of pure CdS and Pt<sub>EG</sub>-CdS.

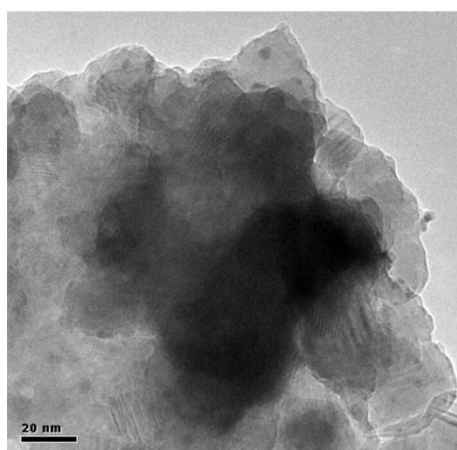

**Figure S4.** Transmission electron microscopic (TEM) image of Pt<sub>EG</sub>-CdS.

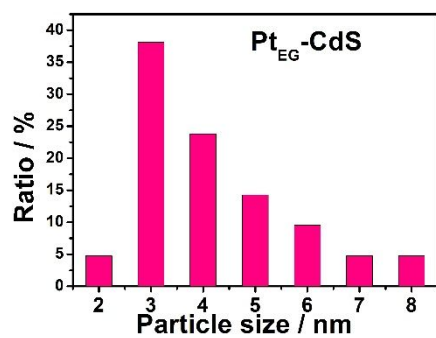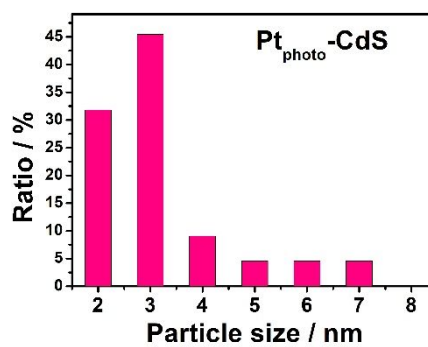

**Figure S5.** Distribution of Pt particle in Pt<sub>EG</sub>-CdS and Pt<sub>photo</sub>-CdS.

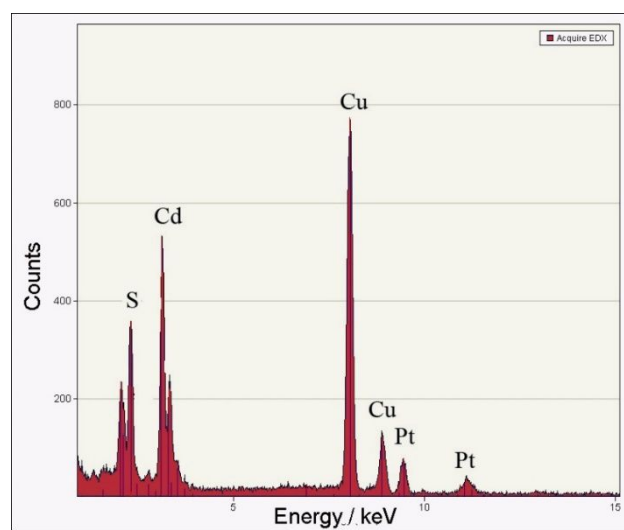

**Figure S6.** Energy dispersive x-ray analysis spectrum (EDS) of Pt<sub>EG</sub>-CdS.

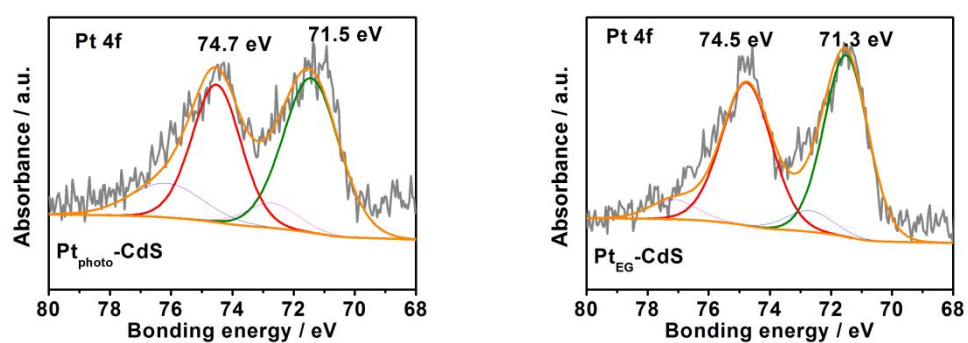

Figure S7. Fine Pt 4f XPS spectra for Pt<sub>photo</sub>-CdS and Pt<sub>EG</sub>-CdS.

**Table S1.** Loading Percentage of Pt for sample prepared with photoreduction and polyol reduction method.

| Theoretical percentage (%)                 | 0 | 0.1  | 0.5  | 1.0  | 2.0  | 5.0  | 10.0 |
|--------------------------------------------|---|------|------|------|------|------|------|
| ICP result of Pt <sub>photo</sub> -CdS (%) | 0 | 0.91 | 0.46 | 0.98 | 1.89 | 4.87 | 9.34 |
| ICP result of Pt <sub>EG</sub> -CdS (%)    | 0 | 0.93 | 0.48 | 0.98 | 1.92 | 4.96 | 9.76 |

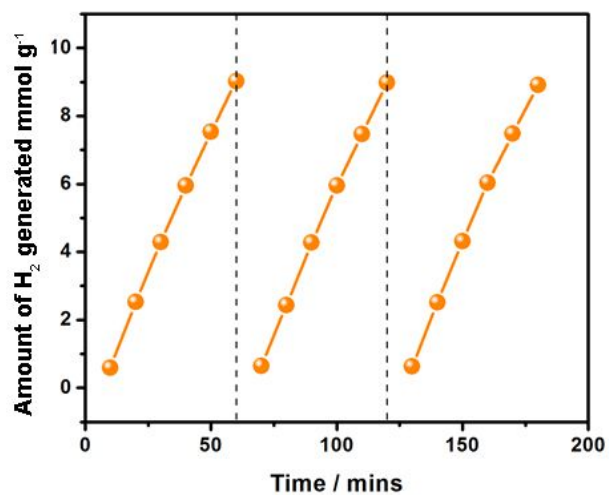

**Figure S8.** Cycling stability of Pt<sub>EG</sub>-CdS in photocatalytic hydrogen evolution.

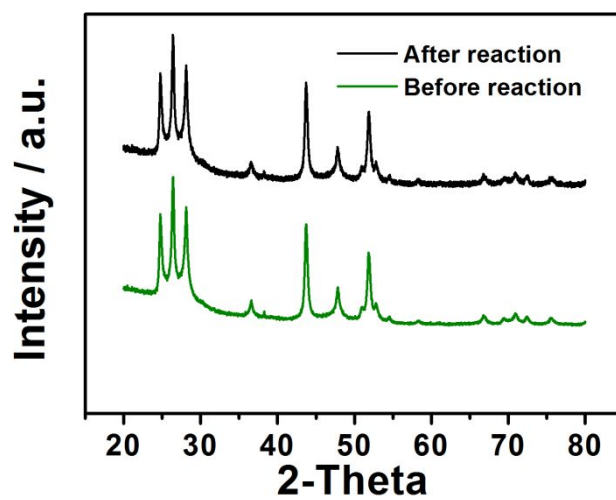

**Figure S9.** TEM image of Pt<sub>EG</sub>-CdS before and after reaction.

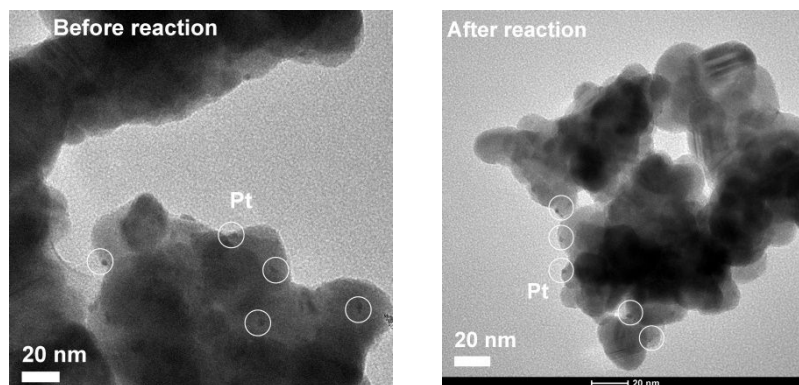

**Figure S10.** TEM image of sample before and after reaction.

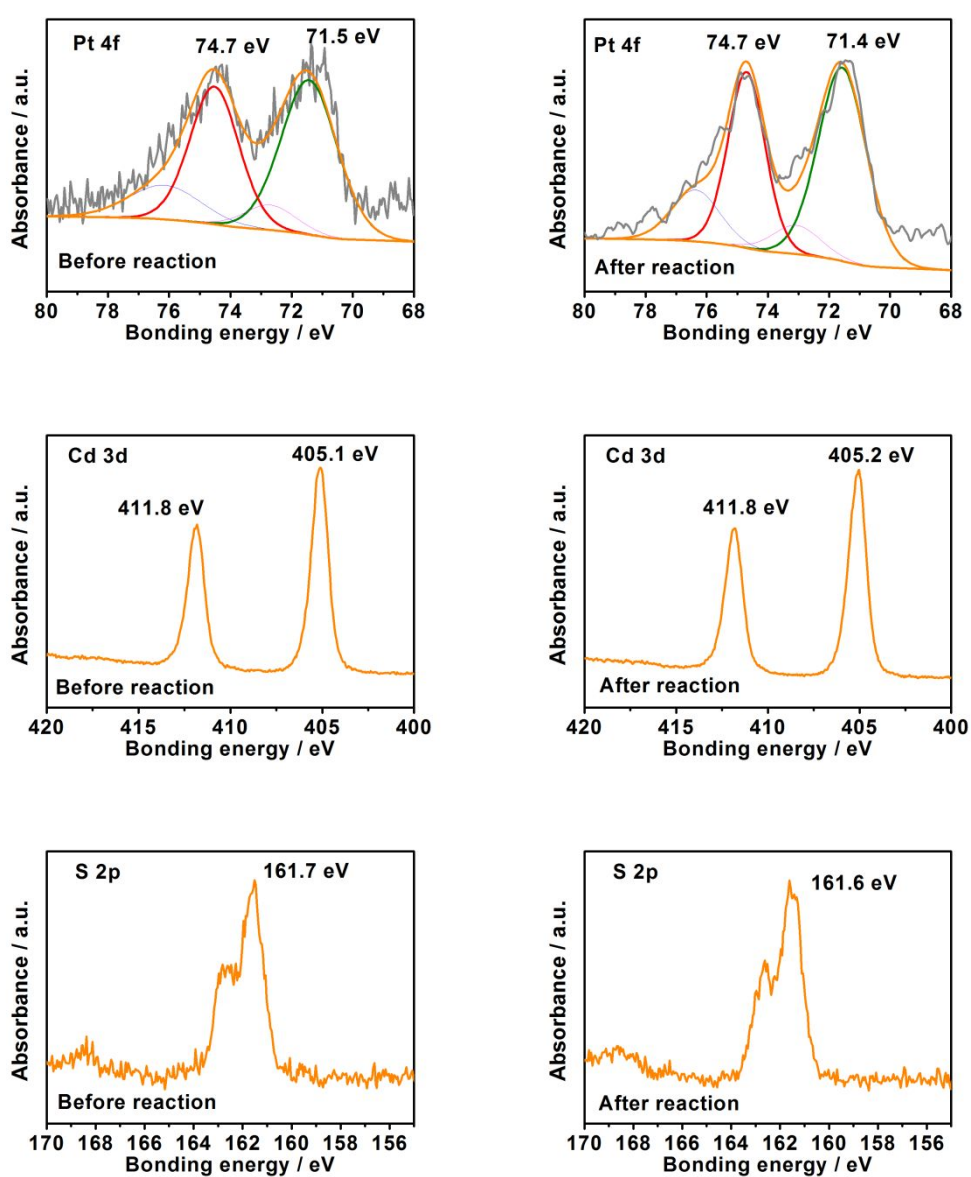

**Figure S11.** Fine XPS of sample before and after photocatalytic reaction.





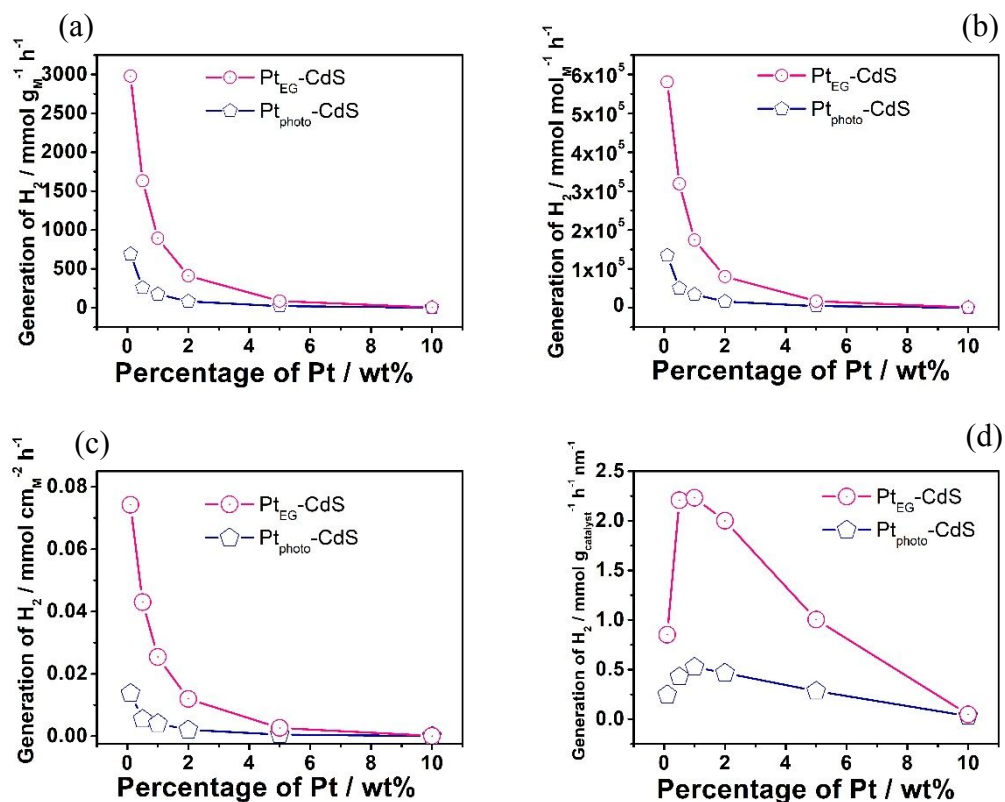

**Figure S12.** Normalized  $\text{H}_2$  generation rates per (a) unit mass of metal ( $\text{mmol g}_M^{-1} \text{h}^{-1}$ ); (b) mol of metal ( $\text{mmol mol}_M^{-1} \text{h}^{-1}$ ); (c) unit area of metal ( $\text{mmol cm}_M^{-2} \text{h}^{-1}$ ) for  $\text{Pt}_{\text{EG}}\text{-CdS}$  and  $\text{Pt}_{\text{photo}}\text{-CdS}$  and (d) unit mass of catalyst divided by average particle size.

**Table S2.** Average particle size of Pt prepared with with photoreduction and polyol reduction method.

| Percentage of Pt (%)                            | 0.1 | 0.5 | 1.0 | 2.0 | 5.0 | 10.0 |
|-------------------------------------------------|-----|-----|-----|-----|-----|------|
| Average particle size for Photoreduction (nm)   | 2.8 | 3.0 | 3.3 | 3.5 | 3.6 | 3.8  |
| Average particle size for Polyol reduction (nm) | 3.5 | 3.7 | 4.0 | 4.1 | 4.3 | 4.8  |

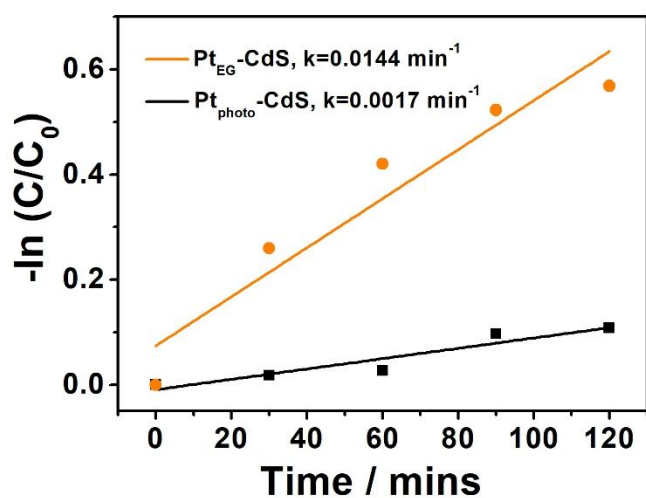

**Figure S13.** The plot of  $-\ln(c/c_0)$  verse time for the p-Nitrophenol degradation over  $Pt_{photo}-CdS$  and  $Pt_{EG}-CdS$ .

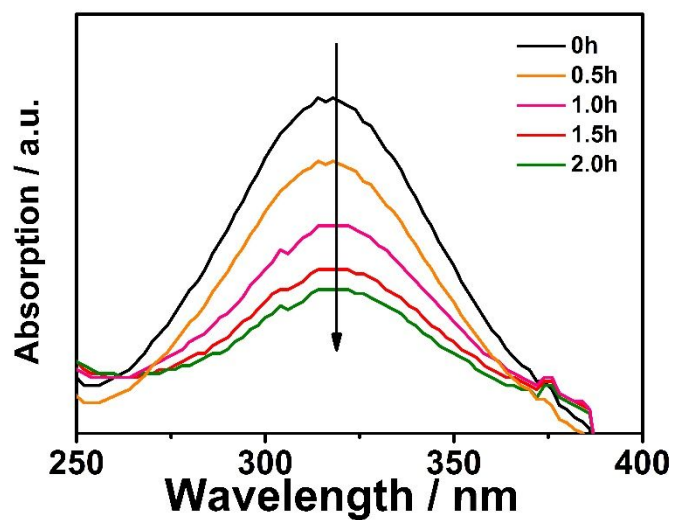

**Figure S14.** Time-dependent absorption spectra of p-nitrophenol solution containing 20 mg

photocatalyst under irradiation.

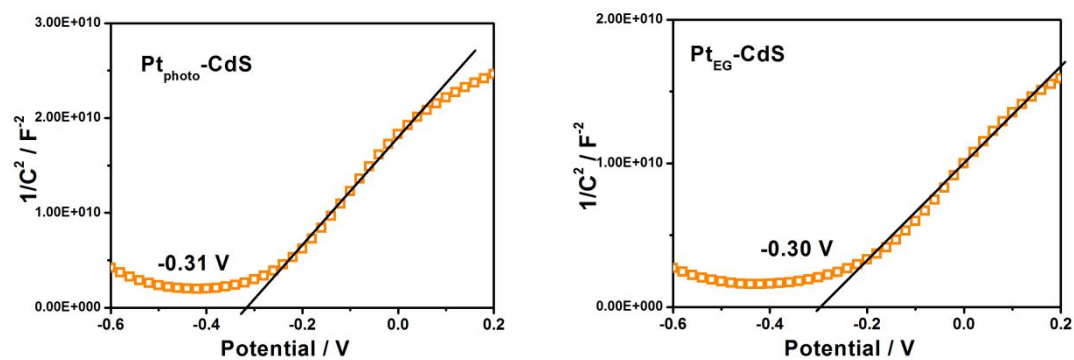

**Figure S15.** Mott-Schottky plot of  $\text{Pt}_{\text{photo}}\text{-CdS}$  and  $\text{Pt}_{\text{EG}}\text{-CdS}$ .

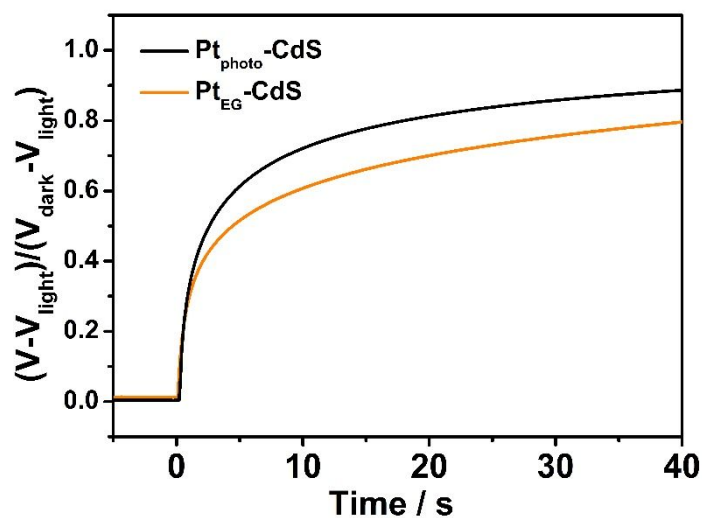

**Figure S16.** Open-circuit potential (OCP) decay curves after turning off the UV light ( $\lambda > 320$  nm).

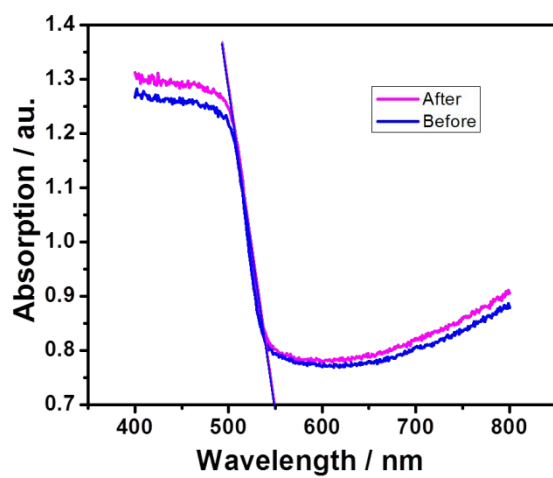

**Figure S17.** UV-visible diffuse reflectance spectra of CdS before (blue) and after (magenta) polyol treatment.

**Table S3.** Values of equivalent circuit elements obtained by fitting the experimental data.

|                          | Rs ( $\Omega$ ) |       | Rct( $\Omega$ ) |       | CPE-T   |         | CPE-P |       |
|--------------------------|-----------------|-------|-----------------|-------|---------|---------|-------|-------|
|                          | dark            | light | dark            | light | dark    | light   | dark  | light |
| CdS                      | 68.93           | 66.69 | 289390          | 1363  | 3.80E-5 | 1.15E-4 | 0.96  | 0.834 |
| Pt <sub>photo</sub> -CdS | 68.68           | 59.1  | 1796            | 757.1 | 8.12E-5 | 1.82E-4 | 0.890 | 0.755 |
| Pt <sub>EG</sub> -CdS    | 66.58           | 72.65 | 1755            | 491.4 | 8.57E-5 | 4.31E-4 | 0.855 | 0.65  |

**Table S4.** Zeta potential of CdS and Pt nanoparticles (prepared by EG reduction method) in a mixed solution of lactic and deionized water.

| Zeta<br>potential | 1      | 2      | 3      | 4      | 5      | mean   |
|-------------------|--------|--------|--------|--------|--------|--------|
| CdS               | 23.55  | 45.53  | 43.55  | 45.53  | 43.55  | 40.03  |
| Pt                | -33.52 | -28.59 | -26.88 | -29.58 | -25.64 | -28.84 |

## Section S1: Charge transfer efficiency study: open circuit potential

The open circuit potential will decay slowly in the scale of seconds when the light is turned off. According to literatures, this decay corresponds to the surface recombination between trapped electrons and reaction intermediates instead of bulk recombination that occur very fast (ns-ms domain).<sup>1, 2</sup> The average recombination rate (k) can be calculated by the following equation:<sup>3, 4</sup>

$$\frac{V - V_{dark}}{V - V_{light}} = 1 - e^{-kt} \quad (1)$$

where V,  $V_{dark}$  and  $V_{light}$  are the open circuit potential at a certain time, in the dark and under illumination; k is the pseudo-first order recombination rate constant. Clearly,  $Pt_{EG}$ -CdS decay much slower than  $Pt_{photo}$ -CdS after light-off, the calculated k of  $Pt_{EG}$ -CdS ( $0.196 \text{ s}^{-1}$ ) is about 2.2 times smaller than that of its  $Pt_{photo}$ -CdS ( $0.429 \text{ s}^{-1}$ ), suggesting the slower charge recombination in  $Pt_{EG}$ -CdS.

## REFERENCE

- (1) Monllor-Satoca, D.; Gomez, R.; Choi, W., Concentration-Dependent Photoredox Conversion of As(III)/As(V) on Illuminated Titanium Dioxide Electrodes. *Environ Sci*

*Technol* **2012**, *46* (10), 5519-5527.

(2) Kim, J.; Monllor-Satoca, D.; Choi, W., Simultaneous production of hydrogen with the degradation of organic pollutants using TiO<sub>2</sub> photocatalyst modified with dual surface components. *Energ Environ Sci* **2012**, *5* (6), 7647-7656.

(3) Kim, H. I.; Monllor-Satoca, D.; Kim, W.; Choi, W., N-doped TiO<sub>2</sub> nanotubes coated with a thin TaOxNy layer for photoelectrochemical water splitting: dual bulk and surface modification of photoanodes. *Energ Environ Sci* **2015**, *8* (1), 247-257.

(4) Wang, S. B.; Pan, L.; Song, J. J.; Mi, W. B.; Zou, J. J.; Wang, L.; Zhang, X. W., Titanium-Defected Undoped Anatase TiO<sub>2</sub> with p-Type Conductivity, Room-Temperature Ferromagnetism, and Remarkable Photocatalytic Performance. *J Am Chem Soc* **2015**, *137* (8), 2975-2983.
